# Supplementary material for: Morphine addiction in ants: a new model for self-administration and neurochemical analysis
Source: Oxford University Press journal article supplement (doi:10.1242/jeb.140616), 2016-09-15
Supplement: jeb140616supp.pdf [file jeb140616supp.pdf]

**Table S1:** Raw Data: Morphine-Exposed (Days 1 to 6)

|                         | <b>0.06 mg/mL Morphine<br/>in 1.0 M (aq) Sucrose</b> |    | <b>0.12 mg/mL Morphine<br/>in 0.5 M (aq) Sucrose</b> |    | <b>0.12 mg/mL Morphine<br/>in H<sub>2</sub>O (aq)</b> |    |
|-------------------------|------------------------------------------------------|----|------------------------------------------------------|----|-------------------------------------------------------|----|
| <b>Colony 1 -<br/>A</b> | 27                                                   | 11 | 4                                                    | 13 | 23                                                    | 40 |
| <b>Colony 1 -<br/>B</b> | 38                                                   | 11 | 12                                                   | 2  | 9                                                     | 3  |
| <b>Colony 2 -<br/>A</b> | 25                                                   | 1  | 13                                                   | 3  | 4                                                     | 0  |
| <b>Colony 2 -<br/>B</b> | 35                                                   | 5  | 26                                                   | 6  | 23                                                    | 11 |
| <b>Colony 3 -<br/>A</b> | 70                                                   | 50 | 33                                                   | 25 | 17                                                    | 19 |
| <b>Colony 3 -<br/>B</b> | 20                                                   | 19 | 25                                                   | 5  | 25                                                    | 26 |

**Table S2:** Raw Data: Sucrose-Fading (Days 1 to 6)

|                     | <b>1.0 M (aq) Sucrose</b> |    | <b>0.5 M (aq) Sucrose</b> |    | <b>H<sub>2</sub>O (aq)</b> |    |
|---------------------|---------------------------|----|---------------------------|----|----------------------------|----|
| <b>Colony 1 - A</b> | 30                        | 29 | 26                        | 6  | 5                          | 7  |
| <b>Colony 1 - B</b> | 44                        | 15 | 13                        | 3  | 12                         | 4  |
| <b>Colony 2 - A</b> | 30                        | 6  | 4                         | 2  | 0                          | 0  |
| <b>Colony 2 - B</b> | 43                        | 16 | 10                        | 2  | 9                          | 13 |
| <b>Colony 3 - A</b> | 18                        | 0  | 10                        | 15 | 13                         | 14 |
| <b>Colony 3 - B</b> | 24                        | 16 | 11                        | 6  | 3                          | 11 |

**Table S3:** Raw Data: Morphine-Exposed (Two-dish choice test)

|                         | <b>0.5 M (aq)<br/>Sucrose</b> | <b>0.12<br/>mg/mL<br/>Morphine<br/>in H<sub>2</sub>O<br/>(aq)</b> |
|-------------------------|-------------------------------|-------------------------------------------------------------------|
| <b>Colony 1 -<br/>A</b> | 8                             | 24                                                                |
| <b>Colony 1 -<br/>B</b> | 5                             | 5                                                                 |
| <b>Colony 2 -<br/>A</b> | 1                             | 5                                                                 |
| <b>Colony 2 -<br/>B</b> | 10                            | 19                                                                |
| <b>Colony 3 -<br/>A</b> | 9                             | 4                                                                 |
| <b>Colony 3 -<br/>B</b> | 16                            | 33                                                                |

**Table S4:** Raw Data: Drug-Naive (Two-dish choice test)

|                         | <b>0.5 M (aq)<br/>Sucrose</b> | <b>0.12<br/>mg/mL<br/>Morphine<br/>in H<sub>2</sub>O<br/>(aq)</b> |
|-------------------------|-------------------------------|-------------------------------------------------------------------|
| <b>Colony 1 -<br/>A</b> | 21                            | 7                                                                 |
| <b>Colony 1 -<br/>B</b> | 14                            | 9                                                                 |
| <b>Colony 2 -<br/>A</b> | 92                            | 46                                                                |
| <b>Colony 2 -<br/>B</b> | 26                            | 8                                                                 |
| <b>Colony 3 -<br/>A</b> | 65                            | 21                                                                |
| <b>Colony 3 -<br/>B</b> | 21                            | 5                                                                 |

**Table S5:** Raw Data: Sucrose-Fading (Two-dish choice test)

|                         | <b>0.5 M (aq)<br/>Sucrose</b> | <b>H<sub>2</sub>O (aq)</b> |
|-------------------------|-------------------------------|----------------------------|
| <b>Colony 1 -<br/>A</b> | 4                             | 1                          |
| <b>Colony 1 -<br/>B</b> | 12                            | 7                          |
| <b>Colony 2 -<br/>A</b> | 5                             | 6                          |
| <b>Colony 2 -<br/>B</b> | 14                            | 9                          |
| <b>Colony 3 -<br/>A</b> | 28                            | 15                         |
| <b>Colony 3 -<br/>B</b> | 27                            | 5                          |
